# Supplementary material
Source: Springer Nature journal article supplement (https://www.springermedizin.de/resource/supplementary/12913_2004_91_MOESM1_ESM.pdf/9534182)
Supplement: MOESM1 [file 9534182]

***1994-95***

N=3787 women aged 40+  
respond to questionnaire and  
consent to data-sharing

N=88 no response / don't  
know for ever/never  
mammogram use

N=134 died / entered  
institution

***1996-97***

N=3565 women remain for  
1996 longitudinal analysis

N=28 no response / don't  
know for ever/never  
mammogram use

N=3537 women respond to  
both cycles

N=210 provide inconsistent responses  
N=3325 provide consistent responses  
N=2 could not be classified
